# Supplementary material
Source: ML conference proceedings conference paper supplement (https://openreview.net/forum?id=0K1OaL6XuK)
Supplement: supplementary_material [file attachment]

# BNF Description of PDDL3.0

Drew McDermott (PDDL1.0)  
Maria Fox and Derek Long (PDDL2.1)  
Joerg Hoffmann and Stefen Edelkamp (PDDL2.2)  
Alfonso Gerevini (contributions to PDDL3.0)

July 24, 2014

## 1 Introduction

This document should be read in conjunction with the PDDL3.0 language proposal. It is intended to provide a clear statement of the structure of the language. Note that the version of the language that is to be used in the 5th IPC limits nesting of certain structures in order to make the problems in handling them more tractable.

### 1.1 Acknowledgements

This document is based on an initial syntax description of PDDL, developed by Drew McDermott. This was extended by Maria Fox and Derek Long to form PDDL2.1 and, subsequently, by Joerg Hoffmann and Stefan Edelkamp to form PDDL2.2. All of these authors have contributed directly to the content of this document.

## 2 BNF Description of PDDL3.0

### 2.1 Domains

Domain descriptions have extended since PDDL2.1: firstly with derived predicated (PDDL2.2) and now with the option to add constraints. Note that both of these extensions have requirements flags.

```
<domain> ::= (define (domain <name>)
               [<require-def>]
               [<types-def>]:typing
               [<constants-def>]
               [<predicates-def>]
               [<functions-def>]:fluents
               [<constraints>]
               <structure-def>*)
<require-def> ::= (:requirements <require-key>+)
<require-key> ::= See Section 2.6
<types-def> ::= (:types <typed list (name)>)
<constants-def> ::= (:constants <typed list (name)>)
```

```

<predicates-def> ::= (:predicates <atomic formula skeleton>+)
<atomic formula skeleton>
  ::= (<predicate> <typed list (variable)>)
<predicate> ::= <name>
<variable> ::= ?<name>
<atomic function skeleton>
  ::= (<function-symbol> <typed list (variable)>)
<function-symbol> ::= <name>
<functions-def> ::= :fluents (:functions <function typed list
  (atomic function skeleton)>)
<constraints> ::= :constraints (:constraints <con-GD>)
<structure-def> ::= <action-def>
<structure-def> ::= :durative-actions <durative-action-def>
<structure-def> ::= :derived-predicates <derived-def>
<typed list (x)> ::= x*
<typed list (x)> ::= :typing x+- <type> <typed list (x)>
<primitive-type> ::= <name>
<type> ::= (either <primitive-type>+)
<type> ::= <primitive-type>
<function typed list (x)> ::= x*
<function typed list (x)> ::= :typing x+- <function type>
  <function typed list (x)>
<function type> ::= number
<emptyOr (x)> ::= ()
<emptyOr (x)> ::= x

```

## 2.2 Actions

The BNF for an action definition is the same as in PDDL2.2, except that it has the additional option of attaching preferences to preconditions.

```

<action-def> ::= (:action <action-symbol>
  :parameters (<typed list (variable)>)
  <action-def body>)
<action-symbol> ::= <name>
<action-def body> ::= [:precondition <emptyOr (pre-GD)>]
  [:effect <emptyOr (effect)>]
<pre-GD> ::= <pref-GD>
<pre-GD> ::= (and <pre-GD>*)
<pre-GD> ::= :universal-preconditions
  (forall (<typed list (variable)>) <pre-GD>)
<pref-GD> ::= :preferences (preference [<pref-name>] <GD>)
<pref-GD> ::= <GD>
<pref-name> ::= <name>
<GD> ::= <atomic formula (term)>
<GD> ::= :negative-preconditions <literal (term)>
<GD> ::= (and <GD>*)
<GD> ::= :disjunctive-preconditions (or <GD>*)
<GD> ::= :disjunctive-preconditions (not <GD>)
<GD> ::= :disjunctive-preconditions (imply <GD> <GD>)
<GD> ::= :existential-preconditions
  (exists (<typed list (variable)>) <GD>)
<GD> ::= :universal-preconditions
  (forall (<typed list (variable)>) <GD>)
<GD> ::= :fluents <f-comp>
<f-comp> ::= (<binary-comp> <f-exp> <f-exp>)

```

```

<literal(t)>      ::= <atomic formula(t)>
<literal(t)>      ::= (not <atomic formula(t)>)
<atomic formula(t)> ::= (<predicate> t*)
<term>           ::= <name>
<term>           ::= <variable>
<f-exp>          ::= <number>
<f-exp>          ::= (<binary-op> <f-exp> <f-exp>)
<f-exp>          ::= (- <f-exp>)
<f-exp>          ::= <f-head>
<f-head>         ::= (<function-symbol> <term>*)
<f-head>         ::= <function-symbol>
<binary-op>      ::= <multi-op>
<binary-op>      ::= -
<binary-op>      ::= /
<multi-op>       ::= *
<multi-op>       ::= +
<binary-comp>    ::= >
<binary-comp>    ::= <
<binary-comp>    ::= =
<binary-comp>    ::= >=
<binary-comp>    ::= <=
<number>         ::= Any numeric literal
                  (integers and floats of form n.n).

<effect>         ::= (and <c-effect>*)
<effect>         ::= <c-effect>
<c-effect>       ::= :conditional-effects
                  (forall (<typed list (variable)>*) <effect>)
<c-effect>       ::= :conditional-effects (when <GD> <cond-effect>)
<c-effect>       ::= <p-effect>
<p-effect>       ::= (<assign-op> <f-head> <f-exp>)
<p-effect>       ::= (not <atomic formula(term)>)
<p-effect>       ::= <atomic formula(term)>
<p-effect>       ::= :fluents (<assign-op> <f-head> <f-exp>)
<cond-effect>    ::= (and <p-effect>*)
<cond-effect>    ::= <p-effect>
<assign-op>      ::= assign
<assign-op>      ::= scale-up
<assign-op>      ::= scale-down
<assign-op>      ::= increase
<assign-op>      ::= decrease

```

## 2.3 Durative Actions

The syntax for durative actions was introduced for PDDL2.1. It remains essentially unchanged, although conditions may now contain preferences. Preferences are always expressed outside the time specifier for a condition.

```

<durative-action-def> ::= (:durative-action <da-symbol>
                          :parameters (<typed list (variable)>)
                          <da-def body>)
<da-symbol>           ::= <name>
<da-def body>         ::= :duration <duration-constraint>
                          :condition <emptyOr (da-GD)>
                          :effect <emptyOr (da-effect)>
<da-GD>               ::= <pref-timed-GD>
<da-GD>               ::= (and <da-GD>*)

```

```

<da-GD> ::= :universal-preconditions
        (forall (<typed-list (variable)>) <da-GD>)
<pref-timed-GD> ::= <timed-GD>
<pref-timed-GD> ::= :preferences
        (preference [<pref-name>] <timed-GD>)
<timed-GD> ::= (at <time-specifier> <GD>)
<timed-GD> ::= (over <interval> <GD>)
<time-specifier> ::= start
<time-specifier> ::= end
<interval> ::= all

```

Duration constraints can take a wide range of forms, but have only be used in previous IPC domains in the simplest forms, where `:duration-inequalities` are not required. No preferences are supported in duration constraints. This is a simplification, but since duration inequalities have not been explored to any serious extent, it seems premature to add still more complication to this part of the language.

```

<duration-constraint> ::= :duration-inequalities
        (and <simple-duration-constraint>+)
<duration-constraint> ::= ()
<duration-constraint> ::= <simple-duration-constraint>
<simple-duration-constraint> ::= (<d-op> ?duration <d-value>)
<simple-duration-constraint> ::= (at <time-specifier>
        <simple-duration-constraint>)
<d-op> ::= :duration-inequalities <=
<d-op> ::= :duration-inequalities >=
<d-op> ::= =
<d-value> ::= <number>
<d-value> ::= :fluents <f-exp>

<da-effect> ::= (and <da-effect>*)
<da-effect> ::= <timed-effect>
<da-effect> ::= :conditional-effects
        (forall (<typed list (variable)>) <da-effect>)
<da-effect> ::= :conditional-effects (when <da-GD> <timed-effect>)
<da-effect> ::= :fluents (<assign-op> <f-head> <f-exp-da>)
<timed-effect> ::= (at <time-specifier> <a-effect>)
<timed-effect> ::= (at <time-specifier> <f-assign-da>)
<timed-effect> ::= :continuous-effects (<assign-op-t> <f-head> <f-exp-t>)
<f-assign-da> ::= (<assign-op> <f-head> <f-exp-da>)
<f-exp-da> ::= (<binary-op> <f-exp-da> <f-exp-da>)
<f-exp-da> ::= (- <f-exp-da>)
<f-exp-da> ::= :duration-inequalities ?duration
<f-exp-da> ::= <f-exp>

```

## 2.4 Derived predicates

The BNF for derived predicates is as follows:

```

<derived-def> ::= (:derived <atomic formula skeleton> <GD>)

```

Note that types may be specified for derived predicate arguments. This might seem redundant, as the predicate types are already declared in the `:predicates` field. Allowing specification of types with the predicate (rule) “parameters” serves to give the

language a more unified look-and-feel, and one might use the option to make the parameter ranges more restrictive. (Remember that the specification of types is optional, not mandatory.)

This BNF is more permissive than is considered a well-formed domain description in PDDL3.0. A predicate  $P$  is called *derived* if there is a rule that has a predicate  $P$  in its head; otherwise  $P$  is called *basic*. The restrictions that apply are:

1. The actions available to the planner do not affect the derived predicates: no derived predicate occurs in any of the effect lists of the domain actions.
2. If a rule indicates that  $P(\bar{x})$  can be derived from  $\phi(\bar{x})$ , then the variables in  $\bar{x}$  are pairwise different (and, as the notation suggests, the free variables of  $\phi(\bar{x})$  are exactly the variables in  $\bar{x}$ , or a subset of them).
3. If a rule indicates that  $P(\bar{x})$  can be derived from  $\phi$ , then the Negation Normal Form (NNF) of  $\phi(\bar{x})$  does not contain any derived predicates in negated form.

## 2.5 Problems

Problems now have an optional additional field for constraints. These are added to those (if any) in the domain file and together they represent a collection of additional goals that must be satisfied by any valid plan. The difference between constraints and regular goals is that they may include conditions on trajectories rather than simply on the final state to which a plan leads.

```

<problem> ::= (define (problem <name>)
                (:domain <name>)
                [<require-def>]
                [<object declaration> ]
                <init>
                <goal>
                [<constraints>]
                [<metric-spec>]
                [<length-spec> ])

<object declaration> ::= (:objects <typed list (name)>)
<init> ::= (:init <init-el>*)
<init-el> ::= <literal (name)>
<init-el> ::= :fluents (= <f-head> <number>)
<init-el> ::= :timed-initial-literals
                (at <number> <literal (name)>)

<goal> ::= (:goal <pre-GD>)
<constraints> ::= :constraints (:constraints <pref-con-GD>)
<pref-con-GD> ::= (and <pref-con-GD>*)
<pref-con-GD> ::= :universal-preconditions
                (forall (<typed list (variable)>) <pref-con-GD>)

<pref-con-GD> ::= :preferences (preference [<pref-name>] <con-GD>)
<pref-con-GD> ::= <con-GD>
<con-GD> ::= (and <con-GD>*)
<con-GD> ::= (forall (<typed list (variable)>) <con-GD>)
<con-GD> ::= (at end <GD>)
<con-GD> ::= (always <GD>)
<con-GD> ::= (sometime <GD>)
<con-GD> ::= (within <number> <GD>)
<con-GD> ::= (at-most-once <GD>)

```

|                |                                                 |
|----------------|-------------------------------------------------|
| <con-GD>       | ::= (sometime-after <GD> <GD>)                  |
| <con-GD>       | ::= (sometime-before <GD> <GD>)                 |
| <con-GD>       | ::= (always-within <number> <GD> <GD>)          |
| <con-GD>       | ::= (hold-during <number> <number> <GD>)        |
| <con-GD>       | ::= (hold-after <number> <GD>)                  |
| <metric-spec>  | ::= (:metric <optimization> <metric-f-exp>)     |
| <optimization> | ::= minimize                                    |
| <optimization> | ::= maximize                                    |
| <metric-f-exp> | ::= (<binary-op> <metric-f-exp> <metric-f-exp>) |
| <metric-f-exp> | ::= (<multi-op> <metric-f-exp> <metric-f-exp>+) |
| <metric-f-exp> | ::= (- <metric-f-exp>)                          |
| <metric-f-exp> | ::= <number>                                    |
| <metric-f-exp> | ::= (<function-symbol> <name>*)                 |
| <metric-f-exp> | ::= <function-symbol>                           |
| <metric-f-exp> | ::= total-time                                  |
| <metric-f-exp> | ::= (is-violated <pref-name>)                   |

Again, the BNF is more permissive than is considered a well-formed problem description in PDDL3.0. The times <number> at which the timed literals occur are restricted to be greater than 0. If there are also derived predicates in the domain, then the timed literals are restricted to not directly modify any of these: that is, like action effects, they are only allowed to affect the truth values of the basic (non-derived) predicates.

## 2.6 Requirements

Here is a table of all requirements in PDDL3.0. Some requirements imply others; some are abbreviations for common sets of requirements. If a domain stipulates no requirements, it is assumed to declare a requirement for :strips.

| <i>Requirement</i>         | <i>Description</i>                                                                                                                                       |
|----------------------------|----------------------------------------------------------------------------------------------------------------------------------------------------------|
| :strips                    | Basic STRIPS-style adds and deletes                                                                                                                      |
| :typing                    | Allow type names in declarations of variables                                                                                                            |
| :negative-preconditions    | Allow not in goal descriptions                                                                                                                           |
| :disjunctive-preconditions | Allow or in goal descriptions                                                                                                                            |
| :equality                  | Support = as built-in predicate                                                                                                                          |
| :existential-preconditions | Allow exists in goal descriptions                                                                                                                        |
| :universal-preconditions   | Allow forall in goal descriptions                                                                                                                        |
| :quantified-preconditions  | = :existential-preconditions<br>+ :universal-preconditions                                                                                               |
| :conditional-effects       | Allow when in action effects                                                                                                                             |
| :fluents                   | Allow function definitions and use of effects using assignment operators and arithmetic preconditions.                                                   |
| :adl                       | = :strips + :typing<br>+ :negative-preconditions<br>+ :disjunctive-preconditions<br>+ :equality<br>+ :quantified-preconditions<br>+ :conditional-effects |
| :durative-actions          | Allows durative actions.<br>Note that this does not imply :fluents.                                                                                      |
| :derived-predicates        | Allows predicates whose truth value is defined by a formula                                                                                              |
| :timed-initial-literals    | Allows the initial state to specify literals that will become true at a specified time point<br>implies durative actions                                 |
| :preferences               | Allows use of preferences in action preconditions and goals.                                                                                             |
| :constraints               | Allows use of constraints fields in domain and problem files. These may contain modal operators supporting trajectory constraints.                       |

### 3 Lifting Restrictions

The restriction on nesting of modal operators can be lifted by adding the rules:

```

<con-GD> ::= (always <con-GD>)
<con-GD> ::= (sometime <con-GD>)
<con-GD> ::= (within <number> <con-GD>)
<con-GD> ::= (at-most-once <con-GD>)
<con-GD> ::= (sometime-after <con-GD> <con-GD>)
<con-GD> ::= (sometime-before <con-GD> <con-GD>)
<con-GD> ::= (always-within <number> <con-GD> <con-GD>)
<con-GD> ::= (hold-during <number> <number> <con-GD>)
<con-GD> ::= (hold-after <number> <con-GD>)

```

This can be further extended by allowing preferences to be nested inside modal operators. These extensions represent significant extensions to the expressive power of the language and we will not allow them in the 5th IPC.
